# Supplementary material for: Early senescence and production of senescence-associated cytokines are major determinants of radioresistance in head-and-neck squamous cell carcinoma
Source: PubMed Central journal article supplement (PMC8674332; doi:10.1038/s41419-021-04454-5), 2021-12-15
Supplement: 41419_2021_4454_MOESM4_ESM.pdf [file 41419_2021_4454_MOESM4_ESM.pdf]

**Von:** Lauber, Kirsten <[Kirsten.Lauber@med.uni-muenchen.de](mailto:Kirsten.Lauber@med.uni-muenchen.de)>

**Gesendet:** Donnerstag, 25. November 2021 12:25

**An:** Lauber, Kirsten <[Kirsten.Lauber@med.uni-muenchen.de](mailto:Kirsten.Lauber@med.uni-muenchen.de)>

**Cc:** [ulrike.schoetz@staff.uni-marburg.de](mailto:ulrike.schoetz@staff.uni-marburg.de); [seyd.shnayien@gmail.com](mailto:seyd.shnayien@gmail.com); [diana.klein@uk-essen.de](mailto:diana.klein@uk-essen.de); [steffen.spoerl@ukr.de](mailto:steffen.spoerl@ukr.de); [bertram.klinger@charite.de](mailto:bertram.klinger@charite.de); [julia.hess@helmholtz-muenchen.de](mailto:julia.hess@helmholtz-muenchen.de); Orth, Michael Dr.rer.nat. <[Michael.Orth@med.uni-muenchen.de](mailto:Michael.Orth@med.uni-muenchen.de)>; Galabov, Radostin Dr.rer.nat. <[Radostin.Galabov@med.uni-muenchen.de](mailto:Radostin.Galabov@med.uni-muenchen.de)>; Hennel, Roman Dr.rer.nat. <[Roman.Hennel@med.uni-muenchen.de](mailto:Roman.Hennel@med.uni-muenchen.de)>; [benedikt.luka@uniklinik-freiburg.de](mailto:benedikt.luka@uniklinik-freiburg.de); [anja.sieber@charite.de](mailto:anja.sieber@charite.de); [ute.ganswindt@i-med.ac.at](mailto:ute.ganswindt@i-med.ac.at); [andreas.thomsen@uniklinik-freiburg.de](mailto:andreas.thomsen@uniklinik-freiburg.de); [verena.jendrossek@uk-essen.de](mailto:verena.jendrossek@uk-essen.de); Belka, Claus Prof.Dr. <[Claus.Belka@med.uni-muenchen.de](mailto:Claus.Belka@med.uni-muenchen.de)>; [nils.bluethgen@charite.de](mailto:nils.bluethgen@charite.de); [unger@helmholtz-muenchen.de](mailto:unger@helmholtz-muenchen.de); [steffen.unkel@med.uni-goettingen.de](mailto:steffen.unkel@med.uni-goettingen.de); [zitzelsberger@helmholtz-muenchen.de](mailto:zitzelsberger@helmholtz-muenchen.de)

**Betreff:** CDDIS-21-2273R: Agreement to include Samet Mutlu into list of coauthors

**Priorität:** Hoch

Dear coauthors,

regarding our provisionally accepted CDDIS-21-2273 manuscript: Please confirm your agreement that Samet Mutlu is included into the list of coauthors. This is required by the journal standards. Samet has contributed the additional data on necrosis induction during revision (novel Fig. S3).

Please reply to this email simply with: Yes, agree.

Thanks

Kirsten

-----Ursprüngliche Nachricht-----

Von: Ulrike Schötz <ulrike.schoetz@staff.uni-marburg.de>

Gesendet: Donnerstag, 25. November 2021 12:28

An: Lauber, Kirsten <Kirsten.Lauber@med.uni-muenchen.de>

Cc: seydnayien@gmail.com; diana.klein@uk-essen.de; steffen.spoerl@ukr.de;

bertram.klinger@charite.de; julia.hess@helmholtz-muenchen.de; Orth, Michael Dr.rer.nat.

<Michael.Orth@med.uni-muenchen.de>; Galabov, Radostin Dr.rer.nat.

<Radostin.Galabov@med.uni-muenchen.de>; Hennel, Roman Dr.rer.nat. <Roman.Hennel@med.uni-

muenchen.de>; benedikt.luka@uniklinik-freiburg.de; anja.sieber@charite.de; ute.ganswindt@i-

med.ac.at; andreas.thomsen@uniklinik-freiburg.de; verena.jendrossek@uk-essen.de; Belka, Claus

Prof.Dr. <Claus.Belka@med.uni-muenchen.de>; nils.bluetgen@charite.de; unger@helmholtz-

muenchen.de; steffen.unkel@med.uni-goettingen.de; zitzelsberger@helmholtz-muenchen.de

Betreff: Re: CDDIS-21-2273R: Agreement to include Samet Mutlu into list of coauthors

Yes, agree.

Ulrike Schötz

**Von:** Klein, Diana <Diana.Klein@uk-essen.de>

**Gesendet:** Donnerstag, 25. November 2021 12:40

**An:** Lauber, Kirsten <Kirsten.Lauber@med.uni-muenchen.de>

**Cc:** ulrike.schoetz@staff.uni-marburg.de; seyd.shnayien@gmail.com; steffen.spoerl@ukr.de; bertram.klinger@charite.de; julia.hess@helmholtz-muenchen.de; Orth, Michael Dr.rer.nat. <Michael.Orth@med.uni-muenchen.de>; Galabov, Radostin Dr.rer.nat. <Radostin.Galabov@med.uni-muenchen.de>; Hennel, Roman Dr.rer.nat. <Roman.Hennel@med.uni-muenchen.de>; benedikt.luka@uniklinik-freiburg.de; anja.sieber@charite.de; ute.ganswindt@i-med.ac.at; andreas.thomsen@uniklinik-freiburg.de; Jendrossek, Verena <Verena.Jendrossek@uk-essen.de>; Belka, Claus Prof.Dr. <Claus.Belka@med.uni-muenchen.de>; nils.bluethgen@charite.de; unger@helmholtz-muenchen.de; steffen.unkel@med.uni-goettingen.de; zitzelsberger@helmholtz-muenchen.de

**Betreff:** AW: CDDIS-21-2273R: Agreement to include Samet Mutlu into list of coauthors

Yes, agree.

LG, Diana

**Von:** Klinger, Bertram <bertram.klinger@charite.de>

**Gesendet:** Donnerstag, 25. November 2021 13:56

**An:** Lauber, Kirsten <Kirsten.Lauber@med.uni-muenchen.de>

**Betreff:** Re: [ext] CDDIS-21-2273R: Agreement to include Samet Mutlu into list of coauthors [signed OK]

**Priorität:** Hoch

Yes, agree

Best wishes

Bertram Klinger

**Von:** Unkel, Steffen <steffen.unkel@med.uni-goettingen.de>

**Gesendet:** Donnerstag, 25. November 2021 12:44

**An:** Lauber, Kirsten <Kirsten.Lauber@med.uni-muenchen.de>

**Betreff:** AW: CDDIS-21-2273R: Agreement to include Samet Mutlu into list of coauthors

Yes, I do agree.

Steffen Unkel

**Von:** Seyd Shnayien <seyd.shnayien@gmail.com>

**Gesendet:** Donnerstag, 25. November 2021 16:14

**An:** Galabov, Radostin Dr.rer.nat. <Radostin.Galabov@med.uni-muenchen.de>

**Cc:** Lauber, Kirsten <Kirsten.Lauber@med.uni-muenchen.de>; ulrike.schoetz@staff.uni-marburg.de; diana.klein@uk-essen.de; steffen.spoerl@ukr.de; bertram.klinger@charite.de; julia.hess@helmholtz-muenchen.de; Orth, Michael Dr.rer.nat. <Michael.Orth@med.uni-muenchen.de>; Hennel, Roman Dr.rer.nat. <Roman.Hennel@med.uni-muenchen.de>; benedikt.luka@uniklinik-freiburg.de; anja.sieber@charite.de; ute.ganswindt@i-med.ac.at; andreas.thomsen@uniklinik-freiburg.de; verena.jendrossek@uk-essen.de; Belka, Claus Prof.Dr. <Claus.Belka@med.uni-muenchen.de>; nils.bluetgen@charite.de; unger@helmholtz-muenchen.de; steffen.unkel@med.uni-goettingen.de; zitzelsberger@helmholtz-muenchen.de

**Betreff:** Re: CDDIS-21-2273R: Agreement to include Samet Mutlu into list of coauthors

Yes, agree.

**Von:** Dr. Andreas Thomsen <andreas.thomsen@uniklinik-freiburg.de>

**Gesendet:** Donnerstag, 25. November 2021 15:48

**An:** Lauber, Kirsten <Kirsten.Lauber@med.uni-muenchen.de>

**Betreff:** AW: CDDIS-21-2273R: Agreement to include Samet Mutlu into list of coauthors

Yes, agree

**Von:** Steffen Spoerl <Steffen.Spoerl@klinik.uni-regensburg.de>

**Gesendet:** Donnerstag, 25. November 2021 15:23

**An:** Lauber, Kirsten <Kirsten.Lauber@med.uni-muenchen.de>

**Betreff:** Aw: [EXT] CDDIS-21-2273R: Agreement to include Samet Mutlu into list of coauthors

Dear Kisten,

of course I agree to include Samet Mutlu in the list of co-authors!

Best

Steffen

**Von:** Galabov, Radostin Dr.rer.nat. <Radostin.Galabov@med.uni-muenchen.de>

**Gesendet:** Donnerstag, 25. November 2021 13:51

**An:** Lauber, Kirsten <Kirsten.Lauber@med.uni-muenchen.de>

**Cc:** ulrike.schoetz@staff.uni-marburg.de; seyd.shnayien@gmail.com; diana.klein@uk-essen.de; steffen.spoerl@ukr.de; bertram.klinger@charite.de; julia.hess@helmholtz-muenchen.de; Orth, Michael Dr.rer.nat. <Michael.Orth@med.uni-muenchen.de>; Hennel, Roman Dr.rer.nat. <Roman.Hennel@med.uni-muenchen.de>; benedikt.luka@uniklinik-freiburg.de; anja.sieber@charite.de; ute.ganswindt@i-med.ac.at; andreas.thomsen@uniklinik-freiburg.de; verena.jendrossek@uk-essen.de; Belka, Claus Prof.Dr. <Claus.Belka@med.uni-muenchen.de>; nils.bluethgen@charite.de; unger@helmholtz-muenchen.de; steffen.unkel@med.uni-goettingen.de; zitzelsberger@helmholtz-muenchen.de

**Betreff:** AW: CDDIS-21-2273R: Agreement to include Samet Mutlu into list of coauthors

Yes, agree

**Von:** Dr. Benedikt Luka <benedikt.luka@uniklinik-freiburg.de>

**Gesendet:** Donnerstag, 25. November 2021 13:08

**An:** Lauber, Kirsten <Kirsten.Lauber@med.uni-muenchen.de>

**Betreff:** AW: CDDIS-21-2273R: Agreement to include Samet Mutlu into list of coauthors

Yes, agree.

UNIVERSITÄTSKLINIKUM FREIBURG  
Department f. Zahn-, Mund- u. Kieferheilkunde  
Klinik für Zahnerhaltungskunde und Parodontologie

Dr. Benedikt Luka  
Wissenschaftlicher Mitarbeiter/Zahnarzt  
der Stiftungsprofessur für Kariesforschung

Hugstetter Str. 55  
D-79106 Freiburg i. Br.

Tel.: ++49-761-270 47560  
Skr.: ++49-761-270 47280  
Fax: ++49-761-270 47390

[benedikt.luka@uniklinik-freiburg.de](mailto:benedikt.luka@uniklinik-freiburg.de)  
[www.uniklinik-freiburg.de](http://www.uniklinik-freiburg.de)

**Von:** Jendrossek, Verena <Verena.Jendrossek@uk-essen.de>

**Gesendet:** Donnerstag, 25. November 2021 12:34

**An:** Lauber, Kirsten <Kirsten.Lauber@med.uni-muenchen.de>; ulrike.schoetz@staff.uni-marburg.de

**Betreff:** Re: CDDIS-21-2273R: Agreement to include Samet Mutlu into list of coauthors

Yes, I agree,

Verena

**Von:** Kristian Unger PD Dr. <unger@helmholtz-muenchen.de>

**Gesendet:** Donnerstag, 25. November 2021 12:38

**An:** Lauber, Kirsten <Kirsten.Lauber@med.uni-muenchen.de>

**Cc:** ulrike.schoetz@staff.uni-marburg.de; seyed.shnayien@gmail.com; Diana Klein <diana.klein@uk-essen.de>; steffen.spoerl@ukr.de; bertram.klinger@charite.de; "Dr. Julia Heß" <julia.hess@helmholtz-muenchen.de>; Orth, Michael Dr.rer.nat. <Michael.Orth@med.uni-muenchen.de>; Galabov, Radostin Dr.rer.nat. <Radostin.Galabov@med.uni-muenchen.de>; Hennel, Roman Dr.rer.nat. <Roman.Hennel@med.uni-muenchen.de>; benedikt.luka@uniklinik-freiburg.de; anja.sieber@charite.de; ute.ganswindt@i-med.ac.at; andreas.thomsen@uniklinik-freiburg.de; verena.jendrossek@uk-essen.de; Belka, Claus Prof.Dr. <Claus.Belka@med.uni-muenchen.de>; Nils Blüthgen <nils.bluehgen@charite.de>; steffen.unkel@med.uni-goettingen.de; Horst Zitzelsberger <zitzelsberger@helmholtz-muenchen.de>

**Betreff:** Re: CDDIS-21-2273R: Agreement to include Samet Mutlu into list of coauthors [signed OK]

**Priorität:** Hoch

Yes, I agree.

—

PD Dr. Kristian Unger

team leader Translational Bioinformatics and deputy head of research unit

Radiation Cytogenetics

Tel.: +49-89-3187-3515

**Von:** Hennel, Roman Dr.rer.nat. <Roman.Hennel@med.uni-muenchen.de>

**Gesendet:** Donnerstag, 25. November 2021 13:54

**An:** Lauber, Kirsten <Kirsten.Lauber@med.uni-muenchen.de>

**Betreff:** AW: CDDIS-21-2273R: Agreement to include Samet Mutlu into list of coauthors

Yes, agree.

Viele Grüße

Roman

**Von:** Julia Hess <julia.hess@helmholtz-muenchen.de>

**Gesendet:** Donnerstag, 25. November 2021 12:38

**An:** Lauber, Kirsten <Kirsten.Lauber@med.uni-muenchen.de>

**Cc:** ulrike.schoetz@staff.uni-marburg.de; seyed.shnayien@gmail.com; Diana Klein <diana.klein@uk-essen.de>; steffen.spoerl@ukr.de; Bertram Klinger <bertram.klinger@charite.de>; Orth, Michael Dr.rer.nat. <Michael.Orth@med.uni-muenchen.de>; Galabov, Radostin Dr.rer.nat. <Radostin.Galabov@med.uni-muenchen.de>; Hennel, Roman Dr.rer.nat. <Roman.Hennel@med.uni-muenchen.de>; benedikt.luka@uniklinik-freiburg.de; anja.sieber@charite.de; ute.ganswindt@i-med.ac.at; andreas.thomsen@uniklinik-freiburg.de; verena.jendrossek@uk-essen.de; Belka, Claus Prof.Dr. <Claus.Belka@med.uni-muenchen.de>; nils.bluethgen@charite.de; Kristian Unger <unger@helmholtz-muenchen.de>; steffen.unkel@med.uni-goettingen.de; Horst Zitzelsberger <zitzelsberger@helmholtz-muenchen.de>

**Betreff:** Re: CDDIS-21-2273R: Agreement to include Samet Mutlu into list of coauthors

**Priorität:** Hoch

Dear Kirsten,

Yes, agree.

BW Julia

Dr. Julia Heß-Rieger

Head of Therapeutic Targets and Intervention Group  
Research Unit Radiation Cytogenetics

Phone: +49-89-3187-3517

Fax: +49-89-3187-2146

**Von:** Sieber, Anja <anja.sieber@charite.de>

**Gesendet:** Donnerstag, 25. November 2021 12:32

**An:** Lauber, Kirsten <Kirsten.Lauber@med.uni-muenchen.de>

**Betreff:** Re: [ext] CDDIS-21-2273R: Agreement to include Samet Mutlu into list of coauthors

**Priorität:** Hoch

Yes, agree.

**Von:** Blüthgen, Nils <nils.bluethgen@charite.de>

**Gesendet:** Donnerstag, 25. November 2021 12:32

**An:** Lauber, Kirsten <Kirsten.Lauber@med.uni-muenchen.de>

**Cc:** ulrike.schoetz@staff.uni-marburg.de; seyd.shnayien@gmail.com; diana.klein@uk-essen.de; steffen.spoerl@ukr.de; Klinger, Bertram <bertram.klinger@charite.de>; julia.hess@helmholtz-muenchen.de; Orth, Michael Dr.rer.nat. <Michael.Orth@med.uni-muenchen.de>; Galabov, Radostin Dr.rer.nat. <Radostin.Galabov@med.uni-muenchen.de>; Hennel, Roman Dr.rer.nat. <Roman.Hennel@med.uni-muenchen.de>; benedikt.luka@uniklinik-freiburg.de; Sieber, Anja <anja.sieber@charite.de>; ute.ganswindt@i-med.ac.at; andreas.thomsen@uniklinik-freiburg.de; verena.jendrossek@uk-essen.de; Belka, Claus Prof.Dr. <Claus.Belka@med.uni-muenchen.de>; unger@helmholtz-muenchen.de; steffen.unkel@med.uni-goettingen.de; zitzelsberger@helmholtz-muenchen.de

**Betreff:** Re: [ext] CDDIS-21-2273R: Agreement to include Samet Mutlu into list of coauthors

Yes, I agree

**Von:** Belka, Claus Prof.Dr. <Claus.Belka@med.uni-muenchen.de>

**Gesendet:** Donnerstag, 25. November 2021 12:31

**An:** Lauber, Kirsten <Kirsten.Lauber@med.uni-muenchen.de>

**Betreff:** AW: CDDIS-21-2273R: Agreement to include Samet Mutlu into list of coauthors

Yes, AGREE

Claus Belka

**Von:** Ute Ganswindt <ute.ganswindt@i-med.ac.at>

**Gesendet:** Donnerstag, 25. November 2021 12:29

**An:** Lauber, Kirsten <Kirsten.Lauber@med.uni-muenchen.de>

**Betreff:** AW: CDDIS-21-2273R: Agreement to include Samet Mutlu into list of coauthors

Yes, agree.

**Univ.-Prof. Dr. med. Ute Ganswindt**

Direktorin Univ.-Klinik für Strahlentherapie-Radioonkologie

Anichstr. 35 | 6020 Innsbruck | Tel +43 512 504 22800

Fax +43 512 504 22869

[ute.ganswindt@i-med.ac.at](mailto:ute.ganswindt@i-med.ac.at)

[ute.ganswindt@tirol-kliniken.at](mailto:ute.ganswindt@tirol-kliniken.at)

**Von:** Orth, Michael Dr.rer.nat. <Michael.Orth@med.uni-muenchen.de>

**Gesendet:** Donnerstag, 25. November 2021 12:28

**An:** Lauber, Kirsten <Kirsten.Lauber@med.uni-muenchen.de>

**Cc:** ulrike.schoetz@staff.uni-marburg.de; seyd.shnayien@gmail.com; diana.klein@uk-essen.de; steffen.spoerl@ukr.de; bertram.klinger@charite.de; julia.hess@helmholtz-muenchen.de; Galabov, Radostin Dr.rer.nat. <Radostin.Galabov@med.uni-muenchen.de>; Hennel, Roman Dr.rer.nat. <Roman.Hennel@med.uni-muenchen.de>; benedikt.luka@uniklinik-freiburg.de; anja.sieber@charite.de; ute.ganswindt@i-med.ac.at; andreas.thomsen@uniklinik-freiburg.de; verena.jendrossek@uk-essen.de; Belka, Claus Prof.Dr. <Claus.Belka@med.uni-muenchen.de>; nils.bluetgen@charite.de; unger@helmholtz-muenchen.de; steffen.unkel@med.uni-goettingen.de; zitzelsberger@helmholtz-muenchen.de

**Betreff:** AW: CDDIS-21-2273R: Agreement to include Samet Mutlu into list of coauthors

Yes, agree.

**Von:** Zitzelsberger, Horst, Prof. Dr. <zitzelsberger@helmholtz-muenchen.de>

**Gesendet:** Donnerstag, 25. November 2021 12:26

**An:** Lauber, Kirsten <Kirsten.Lauber@med.uni-muenchen.de>

**Betreff:** Re: CDDIS-21-2273R: Agreement to include Samet Mutlu into list of coauthors

Yes, agree!

Kind regards,

Horst Zitzelsberger

Prof. Dr. Horst Zitzelsberger

Abteilungsleiter/Head of Research Unit

Abteilung Strahlenzytogenetik/Research Unit Radiation Cytogenetics

Tel.: +49-89-31873421

Fax: +49-89-31872146

Email:Zitzelsberger@helmholtz-muenchen.de
